# Supplementary material for: Inhibition of lncRNA-NEAT1 sensitizes 5-Fu resistant cervical cancer cells through de-repressing the microRNA-34a/LDHA axis
Source: PubMed Central journal article supplement (PMC8298262; doi:10.1042/bsr20200533), 2021-07-22
Supplement: BSR-2020-0533_supp.pdf [file BSR-2020-0533_supp.pdf]

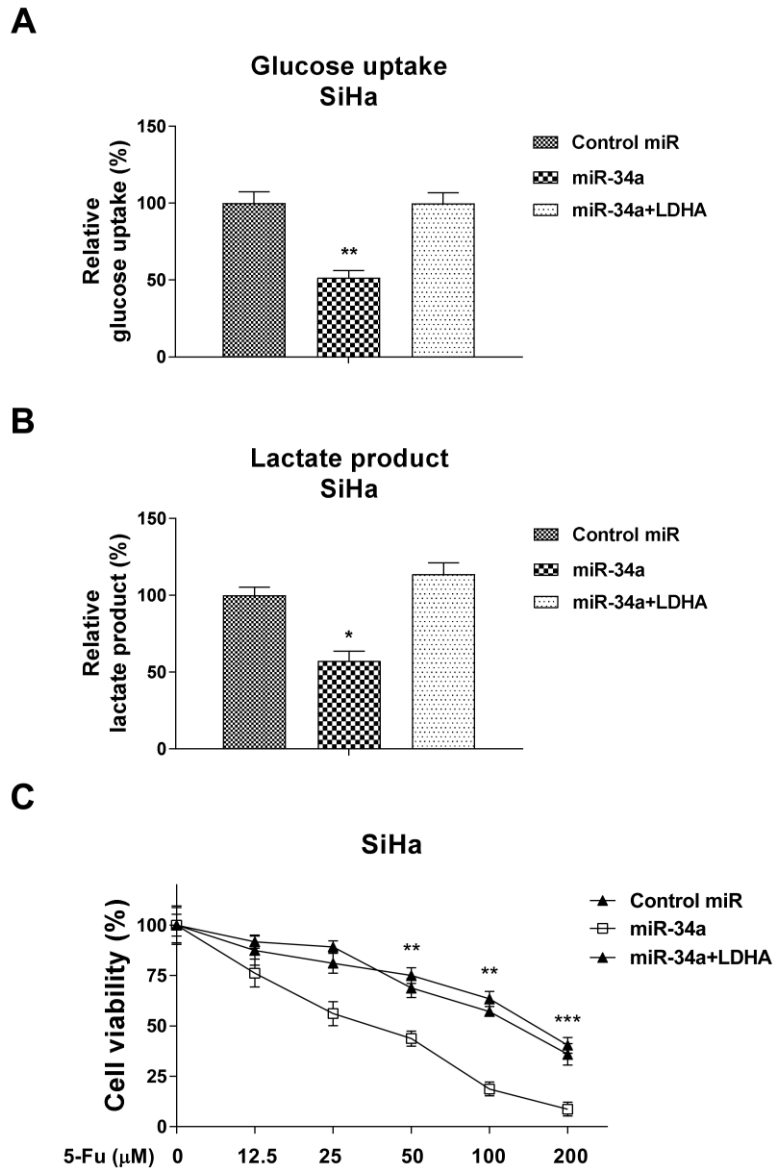

**Figure S1. Rescue experiments for miR-34a-LDHA axis from SiHa cells.** (A) SiHa cells were transfected with control miRNAs, miR-34a precursor or miR-34a precursor plus LDHA overexpression vector for 48 hours, the glucose uptake and (B) lactate product were examined. (C) The above transfected SiHa cells were treated with 5-Fu at the indicated concentrations for 48 hours. Cell viabilities were examined by MTT assay. All data were shown as mean  $\pm$  S.D. \*,  $p < 0.05$ ; \*\*,  $p < 0.01$ ; \*\*\*,  $p < 0.001$ .

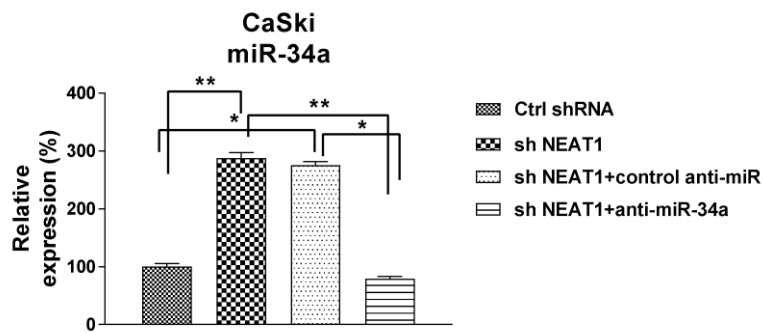

**Figure S2.** Expressions of miR-34a were determined by qRT-PCR in CaSki cells transfected with control shRNA, NEAT1 shRNA alone, NEAT1 shRNA plus control antisense, or NEAT1 shRNA plus miR34a antisense. All data were shown as mean  $\pm$  S.D. \*,  $p < 0.05$ ; \*\*,  $p < 0.01$ .

**Supplementary material 1.** Original WB results for figure 5D, 6C, 7A, 8A
